# 1 IRON MAN, a ubiquitous family of peptides that 2 control iron transport in plants

3

4 Louis Grillet<sup>1‡</sup>, Ping Lan<sup>1,2‡</sup>, Wenfeng Li<sup>1,3</sup>, Girish Mokkalapati<sup>1</sup> & Wolfgang Schmidt<sup>1,4,5</sup>

5

6 <sup>1</sup>Institute of Plant and Microbial Biology, Academia Sinica, 11529 Taipei, Taiwan.

7 <sup>2</sup>State Key Laboratory of Soil and Sustainable Agriculture, Institute of Soil Science, Chinese  
8 Academy of Sciences, 210008 Nanjing, China.

9 <sup>3</sup>Collaborative Innovation Center of Sustainable Forestry in Southern China of Jiangsu  
10 Province, Nanjing Forestry University, 210037 Nanjing, China.

11 <sup>4</sup>Graduate Institute of Biotechnology, National Chung Hsing University, 402 Taichung,  
12 Taiwan.

13 <sup>5</sup>Genome and Systems Biology Degree Program, College of Life Science, National Taiwan  
14 University, 10617 Taipei, Taiwan.

15 <sup>‡</sup>These authors contributed equally to this work

16

17 Iron (Fe) is an essential mineral nutrient which severely affects the growth, yield and  
18 nutritional quality of plants if not supplied in sufficient quantities. We here report that a short  
19 C-terminal amino acid sequence consensus motif (IRON MAN; IMA) conserved across  
20 numerous, highly diverse peptides in angiosperms, is essential for Fe uptake in plants.  
21 Overexpression of the IMA sequence in *Arabidopsis* induced Fe uptake genes in roots,  
22 causing accumulation of Fe and manganese in all plant parts including seeds. Silencing of all  
23 eight *IMA* genes harbored by the *Arabidopsis* genome abolished Fe uptake and caused severe  
24 chlorosis; increasing the Fe supply or overexpressing *IMA1* restored the wild-type phenotype.  
25 *IMA1* is predominantly expressed in the phloem, preferentially in leaves, and reciprocal  
26 grafting showed that IMA1 peptides in shoots positively regulate Fe uptake in roots. *IMA*  
27 homologs are highly responsive to the Fe status and functional when heterologously  
28 expressed across species. IMA constitutes a novel family of peptides which are critical for the  
29 acquisition and cellular homeostasis of Fe across land plants.

30

31 Although iron (Fe) is one of the most abundant elements on earth, the extremely low activity  
32 of free Fe in most soils often severely restricts its uptake, making Fe deficiency a common

33 nutritional disorder in plants. In human populations, insufficient dietary Fe intake resulting  
34 from low Fe concentrations in edible plant parts is the cause of Fe deficiency-induced anemia  
35 (IDA), affecting more than one billion people worldwide, particularly in areas where Fe  
36 supply depends mainly or entirely on plants<sup>1</sup>. Understanding how plants regulate the uptake  
37 and distribution of Fe is thus mandatory to produce Fe-enriched germplasms and combat  
38 IDA.

39 Plants have evolved multifaceted strategies to acquire Fe from soils<sup>2,3</sup>. Rice (*Oryza*  
40 *sativa*) and other graminaceous species take up Fe after secretion of Fe<sup>3+</sup>-binding  
41 phytosiderophores (PS) and subsequent uptake of the Fe<sup>3+</sup>-PS complex via an oligopeptide  
42 transporter of the YSL family (Strategy II)<sup>2,4,5</sup>. *Arabidopsis* and all non-grass species employ  
43 a reduction-based Fe acquisition mechanism (Strategy I), in which Fe<sup>3+</sup> is first reduced by the  
44 Fe<sup>3+</sup>-chelate reductase FRO2. The reduced Fe<sup>2+</sup> is then transported across the plasma  
45 membrane by the ZIP family transporter IRT1<sup>6-8</sup>. Solubilization of recalcitrant Fe pools is  
46 facilitated by P-type ATPase-driven proton extrusion<sup>9</sup>. The two Fe acquisition strategies are  
47 thought to be mutually exclusive<sup>2</sup>. However, rice possesses an Fe<sup>2+</sup> uptake system<sup>10</sup> and,  
48 similar to the PS-system of grasses, *Arabidopsis* and other non-graminaceous species secrete  
49 Fe<sup>3+</sup>-mobilizing coumarins<sup>11-15</sup>, indicating that the two mechanisms share analogous  
50 components.

51 In *Arabidopsis*, the bHLH-type transcription factors PYE and FIT control non-  
52 overlapping subsets of genes involved in the acquisition and cellular homeostasis of Fe<sup>16,17</sup>.  
53 FIT forms heterodimers with the 1b subgroup bHLH proteins bHLH38, bHLH39, bHLH100  
54 and bHLH101<sup>18,19</sup>. Both FIT and PYE are directly activated by bHLH34, bHLH115 and  
55 bHLH105 (ILR3)<sup>20,21</sup>. The abundance of bHLH104 and bHLH105 is regulated by the Fe-  
56 binding E3 ligase BTS<sup>22</sup>. In rice (*Oryza sativa*), OsIRO2, an ortholog of AtbHLH38/39,  
57 regulates the Fe<sup>3+</sup>-PS transporter OsYSL15<sup>23</sup> but not the uptake of Fe<sup>2+</sup> via OsIRT1<sup>24</sup>. Two  
58 orthologs of BTS, OsHRZ1 and OsHRZ2, negatively regulate Fe uptake presumably via  
59 OsIRO2, OsIRO3, an ortholog of PYE<sup>25,26</sup>, and OsPRI1, an ortholog of bHLH105<sup>27</sup>.

60 The regulation of root Fe acquisition by shoot-derived signals has been demonstrated  
61 more than two decades ago using a graft-transmissible, Fe-accumulating trait of the pea  
62 mutant *dgl*<sup>28</sup>. In *Arabidopsis*, evidence for such signals reside in the enhanced Fe uptake of  
63 the *frd3*<sup>29</sup> and *opt3*<sup>30,31</sup> mutants, respectively defective in root-to-shoot transport and phloem  
64 loading of Fe. The nature of the long-distance signal that conveys information of the Fe status  
65 of leaves to the roots is a long-standing enigma in Fe research. In nitrogen-deprived roots,  
66 members of a family of 15 amino acid C-terminally Encoded Peptides (CEPs) activate the

67 leucine-rich repeat receptor kinase CEPR<sup>32</sup>. CEPR phosphorylates the phloem-localized class  
68 III glutaredoxin CEPD1<sup>33</sup>, which subsequently acquires the ability to exit the phloem and  
69 migrate to the endodermis. How CEPD1 triggers the expression of the nitrate uptake  
70 transporters NRT1.1, NRT2.1 and NRT3.1 remains elusive.

71 Here, we describe the discovery of a novel peptide family expressed in the phloem  
72 that presumably act as a phloem-mobile signal to control Fe uptake in *Arabidopsis* and,  
73 possibly, constitutes a common component of Fe signaling across Magnoliophyta. Members  
74 of this family harbor a 17-amino acid C-terminal consensus motif highly conserved across  
75 angiosperms that is necessary and sufficient for Fe uptake from the soil.

76

## 77 **Results**

78 Similarities in the proteins controlling cellular Fe homeostasis between rice and *Arabidopsis*  
79 suggest signaling nodes that are conserved across species. To discover novel components  
80 with critical function in Fe homeostasis, we searched for common sequence motifs in Fe-  
81 responsive proteins of unknown function in rice and *Arabidopsis*, two species with well-  
82 explored Fe deficiency responses. To this end, we mined expression data of Fe-responsive  
83 genes that showed greater than 5-fold changes in transcript abundance in response to Fe  
84 deficiency. Sequences of 14 rice and *Arabidopsis* genes encoding proteins of unknown  
85 function<sup>34,35</sup> were screened for common sequence motifs (Supplementary Table 1). The C-  
86 terminal amino acid sequence G-D-D-D-D-x(1,3)-D-x-A-P-A-A was found to be conserved  
87 in two *Arabidopsis* (At1g47400 and At2g30766) and two rice proteins, corresponding to  
88 LOC\_Os01g45914 and to a non-annotated transcript encoded by a gene located between  
89 LOC\_Os07g04910 and LOC\_Os07g04930 that we designated LOC\_Os07g04920 (probe sets  
90 Os.12430.1.S1\_at and Os.48053.1.A1\_at).

91 Transgenic plants over-expressing At1g47400 under the control of the CaMV 35S  
92 promoter displayed necrotic spots on the leaves, resembling Fe toxicity symptoms (Fig. 1a).  
93 Using Perls' and Perls'-DAB Fe staining, we observed high Fe levels in leaves, in the stele,  
94 and in embryos (Fig. 1a). In histological sections of rosette leaves from the wild type, Fe was  
95 detected in xylem vessels, nuclei, and as a diffuse, homogenous signal in plastids (Fig. 1b-e).  
96 By contrast, in rosettes of 35Spro::At1g47400<sub>cDNA</sub> (IMA1c Ox) lines, xylem and nuclei were  
97 more heavily stained and plastids were scattered with numerous Fe-rich granules resembling  
98 ferritins (Fig. 1f-i)<sup>36</sup>. Fe accumulation in the apoplast around shrunk cells was evident at  
99 necrotic regions (Fig. 1j, k), confirming that necrosis was associated with excess Fe  
100 accumulation. Mineral nutrient analysis of IMA1c Ox plants by ICP-MS revealed

101 dramatically increased levels of Fe, zinc (Zn) and manganese (Mn). In rosette leaves, an up to  
102 10-fold increase in Fe, a 6-fold increase in Mn, a 4-fold increase in Zn but no change in  
103 copper (Cu) concentration was observed when compared to the wild type (Fig. 11;  
104 Supplementary Fig. 1b). Importantly, the seed Fe concentration was increased two- to three-  
105 fold in transgenic lines. Seed yield was largely unaffected and only slightly reduced in two  
106 overexpression (Ox) lines (#0-8 and #2-1; Supplementary Fig. 1c).

107 Owing to the observed accumulation of Fe and Mn caused by the over-expression of  
108 At1g47400, we designated genes encoding peptides that contain the G-D-D-D-D-x(1,3)-D-x-  
109 A-P-A-A consensus motif *IRON MAN (IMA)*. The *Arabidopsis* genome harbors eight *IMA*  
110 genes (Supplementary Fig. 2a), which are all responsive to the Fe supply (Supplementary  
111 Fig. 2b). *AtIMA1* (At1g47400), *AtIMA2* (At1g47395) and *AtIMA3* (At2g30766) are highly  
112 expressed in both leaves and roots of Fe-deficient plants<sup>35,37</sup>. By contrast, *AtIMA4*, which we  
113 designated At1g47402, *AtIMA5* (designated At1g47406), *AtIMA6* (designated At1g47407),  
114 *AtIMA7* (designated At2g44744), and *AtIMA8* (designated At1g47401) are expressed at lower  
115 levels and are not included in the TAIR10 genome annotation (Supplementary Table 2).

116 *IMA2* shares 82% sequence identity with *IMA1* and is organized as a tandem repeat.  
117 *IMA1* and *IMA3* share only sequence identity within the IMA motif. To uncover possible  
118 functional diversity among IMA peptides, we generated also transgenic lines overexpressing  
119 *IMA3*. Growth of both *IMA1* Ox and *IMA3* Ox lines appeared to be negatively correlated  
120 with the Fe concentration (Fig. 2a; Supplementary Fig. 3a,c). No significant growth penalty  
121 of the IMA Ox lines was observed in the absence of Fe (Fig. 2a; Supplementary Fig. 3a).  
122 Importantly, when grown on media with limited Fe availability due to immobilization of Fe  
123 by using ferric chloride as an Fe source at neutral pH (navFe, 10  $\mu$ M FeCl<sub>3</sub> at pH 7), rosettes  
124 of most of the IMA Ox lines had higher chlorophyll concentrations and contained  
125 significantly more Fe than control plants overexpressing EYFP (Supplementary Fig. 3b,c),  
126 indicating increased ability to acquire Fe from recalcitrant Fe pools.

127 Overexpression of *IMA1* significantly increased root ferric chelate reduction (FCR)  
128 rates of plants grown under Fe-sufficient conditions; no difference in FCR activity to control  
129 plants was observed when the plants were grown on Fe-deplete media (Fig. 2b). Similar to  
130 what has been observed for *IMA1* Ox plants, in Fe-sufficient *IMA3* Ox lines FCR activity  
131 was constitutively increased (Fig. 2b). However, in contrast to *IMA1* Ox and control plants,  
132 *IMA3* Ox lines failed to further increase their FCR activity upon transfer to Fe-deplete media.  
133 Judging from the similar leaf Fe concentration of *IMA1* Ox and *IMA3* Ox lines, this  
134 phenotypic dissimilarity was not caused by a different Fe status of the two genotypes

135 (Supplementary Fig. 3c). It can thus be assumed that under Fe-deficient conditions the exact  
136 role of IMA peptides in Fe homeostasis may differ among IMA family members.

137 Peptides harboring IMA motifs are present in the genomes of all Magnoliophyta  
138 sequenced so far including the basal angiosperm *Amborella trichopoda*, demonstrating  
139 conservation of IMA in the flowering plant lineage. Based on the available genomic data, we  
140 identified 132 genes encoding putative IMA sequences in 29 plant species (Supplementary  
141 Table 2). This information was used to refine the IMA consensus motif (Fig. 3a). We failed  
142 to detect IMA-encoding sequences in the genomes of gymnosperms, ferns, algae or fungi,  
143 suggesting that IMA emerged at an early stage of angiosperm evolution. All IMA motif-  
144 containing genes are either unannotated or annotated as encoding unknown proteins. Notably,  
145 putative IMA homologs are among the most Fe-responsive genes in both roots and leaves of  
146 species for which data on Fe deficiency-induced changes in transcriptional profiles are  
147 available (see Supplementary Table 2 for gene IDs); e.g. tomato<sup>38</sup> (designated *SlIMA1*), rice<sup>34</sup>  
148 (designated *OsIMA1* and *OsIMA2*) and soybean<sup>39</sup> (designated *GmIMA1-5*). Amino acid  
149 alignments of the encoded peptides show no sequence similarity except for the conserved  
150 IMA sequence (Fig. 3b). Alignment of the amino acid sequences of all IMA-encoding genes  
151 and a phylogenetic tree inferred from the computed sequences are shown in Supplementary  
152 Fig. 4.

153 To verify the supposition that the conserved motif is the functional part of IMA  
154 peptides, we produced transgenic plants overexpressing the 17 C-terminal amino acids of  
155 IMA1 preceded by a start codon. Under standard growth conditions, plants expressing this  
156 construct exhibited constitutively induced FCR activity similar to IMA1 Ox lines (Fig. 3c).  
157 Next, we overexpressed chimeric IMA1 ORFs harboring various deletions in the regions  
158 coding the variable N-terminus (IMA1<sub>o</sub>Δ1 and IMA1<sub>o</sub>Δ2) or the C-terminal motif  
159 (IMA1<sub>o</sub>Δ3). Consistent with the assumption that the C-terminal consensus sequence is  
160 critical for IMA function, plants overexpressing IMA1<sub>o</sub>Δ1 and IMA1<sub>o</sub>Δ2 developed  
161 bronzing spots and exhibited constitutively activated FCR activity, while plants expressing  
162 IMA1<sub>o</sub>Δ3 showed root FCR rates that were not significantly different from those of control  
163 plants (Fig. 3d). All transgenic lines expressed their respective IMA1 ORF version at  
164 comparable levels (Supplementary Fig. 5). Based on these data, we concluded that the IMA  
165 motif in IMA1 is necessary and sufficient to induce Fe uptake in roots. This result implies  
166 that there is a strong likelihood of redundancy between the eight *IMA* genes in *Arabidopsis*.

167 To further clarify the role of IMA1 in Fe uptake, we attempted to silence IMA1 and  
168 its close seqlog IMA2 using an artificial microRNA construct (Supplementary Fig. 6). Plants

169 with decreased expression of both genes grew as big and healthy as control plants in all  
170 conditions tested (Supplementary Fig. 6d), and their ability to induce Fe deficiency was not  
171 affected (Supplementary Fig. 6c). To overcome putative genetic redundancy among the IMA  
172 genes, we silenced all eight *IMA* genes using CRISPR-Cas9 genome editing (Fig. 4). The  
173 generated octuple mutant (*ima8x*) carried two large deletions on chromosome 1 in the 10 kb  
174 region, containing the *IMA1-IMA6* and *IMA8* loci (Supplementary Fig. 7). The ORF of *IMA3*  
175 was subjected to a deletion in the start codon, *IMA7* contained a single nucleotide insertion  
176 resulting in a frameshift (Supplementary Fig. 8). When grown on Fe-replete media, *ima8x*  
177 plants were very small, extremely chlorotic (Fig. 4a, Supplementary Fig. 9a,b), and died  
178 within few days after transfer to soil. This phenotype was exacerbated on media with no or  
179 low available Fe and fully rescued by growing the plants on high Fe media. Induction of root  
180 FCR activity upon transfer to Fe-deplete medium was completely abolished in *ima8x* plants  
181 (Fig. 4b), suggesting that the hypersensitivity of *ima8x* plants to Fe deficiency was due to  
182 impaired Fe uptake. Consistent with the hypothesis of pronounced redundancy between *IMA*  
183 genes, overexpression of *IMA1* and *EYFP:IMA1* in the *ima8x* background restored the  
184 growth, chlorophyll content, and the FCR induction capacity almost to wild-type levels (Fig.  
185 4a-b; Supplementary Fig. 9a-b).

186 To investigate the biological function of *IMA1*, we conducted RNA-seq transcriptome  
187 analyses of leaves and roots from Fe-deficient and Fe-sufficient *IMA1* Ox plants. Genes that  
188 were differentially expressed (DEGs) between *IMA1* Ox and control plants were compared  
189 with Fe deficiency DEGs of wild-type plants that were mined from previously published  
190 transcriptome data<sup>35,11</sup> (Supplementary Fig. 10; Supplementary Dataset 1). Sequencing results  
191 were confirmed in other *IMA1* Ox lines by qRT-PCR for a subset of genes (Supplementary  
192 Fig. 11). In roots of Fe-sufficient *IMA1* Ox plants genes encoding regulators of the Fe  
193 deficiency response (e.g. the subgroup 1b bHLH proteins *bHLH38*, *bHLH39*, *bHLH100* and  
194 *bHLH101*), and proteins involved in the uptake (*FRO2* and *IRT1*) or distribution of Fe  
195 (*NAS1*, *NAS2*, and *FRD3*)<sup>40,41</sup> were strongly induced in the transgenic lines (Supplementary  
196 Fig. 10a,e). Genes encoding proteins important for Fe storage, e.g. the ferritins *FER1* and  
197 *FER3*<sup>42</sup> and the vacuolar Fe transporters *VTL1*, *VTL2*, and *VTL5*<sup>43</sup>, were upregulated in  
198 *IMA1* Ox and downregulated in control plants (Supplementary Fig. 10a,e).

199 In leaves, the expression profile of *IMA1* Ox plants was strikingly different from that  
200 observed in roots (Supplementary Fig.10c, d, f). Genes encoding subgroup 1b bHLH proteins  
201 and other highly Fe-responsive genes were not differentially expressed between *IMA1* Ox  
202 and wild-type plants. By contrast, ferritins, downregulated in Fe-deficient wild-type leaves,

203 as well as genes involved in long-distance circulation and seed loading (*NAS3*<sup>40</sup> and *YSL1*<sup>44</sup>),  
204 were upregulated in leaves of IMA1 Ox. It thus appears that in roots, overexpression of *IMA1*  
205 triggers a pronounced Fe-deficiency response and promotes root-to-shoot translocation of Fe,  
206 while leaves respond with the induction of genes involved in counteracting Fe-excess  
207 (Supplementary Fig.10f). This profile is reminiscent to that of the *opt3* mutant, which  
208 displays an upregulated Fe deficiency response in roots due to compromised shoot-to-root  
209 signaling<sup>30-31</sup>. Leaves of *opt3* plants display a transcriptional profile consistent with  
210 unimpaired local Fe sensing but compromised systemic signaling, leading to a constitutively  
211 activated Fe-deficiency response<sup>45</sup>.

212 In control plants, induction of all but one (*IMA4*) *IMA* genes was more pronounced in  
213 leaves than in roots (Supplementary Fig. 2). Higher transcript levels in leaves compared to  
214 roots were also observed for all putative rice and soybean *IMA* homologs<sup>34,39</sup>. Translatome  
215 profiling of *Arabidopsis* found *IMA1* specifically translated in the phloem<sup>46</sup>, prompting us to  
216 investigate whether IMAs control shoot-to-root signaling of Fe-deficiency. In transgenic lines  
217 expressing a *promIMA1::EYFP* construct, fluorescence was predominantly observed in the  
218 phloem of roots (Fig. 5a-d) and leaves (Fig. 5e,f), suggesting that IMA1 itself could  
219 constitute a mobile signal.

220 Next, we reciprocally grafted IMA1 Ox shoots onto wild-type rootstocks (IMA1  
221 Ox/WT) and wild-type shoot scions onto IMA1 Ox rootstocks (WT/IMA1 Ox), and  
222 determined the FCR activity of the graft combinations. The *opt3-2* mutant was used as a  
223 positive control. Under Fe-replete conditions, the wild type displayed low FCR activity,  
224 whereas *opt3-2* and IMA1 Ox plants displayed high FCR rates (Fig. 6a). Wild-type scions  
225 grafted onto *opt3-2* rootstocks had low FCR activity whereas *opt3-2*/WT grafts displayed  
226 high FCR, confirming that altered signaling from the shoot is causative for the constitutive  
227 root Fe-deficiency response of the *opt3-2* mutant. WT/IMA1 Ox grafts exhibited high root  
228 FCR activity, suggesting that increased IMA levels in roots are sufficient to trigger a  
229 constitutive Fe-deficient response. Wild-type rootstocks grafted with IMA1 Ox shoots  
230 showed a significantly increased FCR when compared to roots of wild-type plants, although  
231 the level was somewhat lower than that of *opt3-2* and IMA1 Ox plants. Ungrafted and self-  
232 grafted Fe-deficient *ima8x* mutants were unable to induce root FCR (Fig. 4b; Fig. 6b).  
233 Reciprocal grafting of the *ima8x* mutant showed that wild-type scions could partly rescue the  
234 impaired FCR induction in *ima8x* rootstocks (Fig. 6b), and wild-type rootstocks grafted with  
235 *ima8x* scions induced an FCR activity to a level similar to that of self-grafted controls.  
236 Furthermore, overexpression of *IMA1* in leaves led to a significant increase of FCR in roots

237 of Fe-sufficient plants. These results support the supposition that IMAs are phloem mobile  
238 peptides that positively regulate iron-deficiency response in roots.

239 In stable transgenic plants expressing an EYFP:IMA1 fusion protein, fluorescence  
240 was observed in the cytosol and nuclei (Fig. 7b,d,f). EYFP:IMA1 lines displayed increased  
241 root FCR activity under Fe-replete conditions, indicating functionality of the fusion protein  
242 (Fig. 7g). Immunodetection using an anti-GFP antibody revealed a protein of a size between  
243 30 and 40 kDa, consistent with the predicted 34.17 kDa of the EYFP:IMA1 chimera (Fig.  
244 7h). No free EYFP was detected, indicating that the fluorescence signal was representative of  
245 the EYFP:IMA1 fusion protein. Interestingly, a similar subcellular localization was observed  
246 for the nitrogen signaling protein CEPD1<sup>33</sup>, indicative of putatively similar regulatory  
247 mechanisms of the two peptides.

248 Systemic Fe signaling was hypothesized to be mediated by cycling Fe through the  
249 phloem, acting as a repressive signal on root Fe uptake<sup>31</sup>. The aspartic acid stretch in the IMA  
250 motif is likely to exhibit affinity for metal ions. We thus investigated whether a synthetic  
251 peptide corresponding to the 17 C-terminal residues of IMA1 (IMA1pep) could form metal  
252 complexes using ESI-MS. Mass spectrometry analysis of IMA1pep metal solutions revealed  
253 that IMA1pep can bind Fe<sup>2+</sup>, Cu<sup>2+</sup>, Cu<sup>+</sup>, Zn<sup>2+</sup>, Mn<sup>2+</sup> but not Fe<sup>3+</sup>, forming complexes of up to  
254 four metal ions per peptide (Supplementary Fig. 12; Supplementary Table 3). When different  
255 metals were provided simultaneously, IMA1pep-Fe<sup>2+</sup>, IMA1pep-Zn<sup>2+</sup>, and IMA1pep-Cu<sup>+</sup>  
256 complexes were observed in the presence of ascorbate as a reductant (Supplementary Fig.  
257 12a); IMA1pep-Mn<sup>2+</sup> and -Cu<sup>2+</sup> complexes were only detected under non-reductive  
258 conditions (Supplementary Fig. 12b). Only complexes with Fe<sup>2+</sup> and Mn<sup>2+</sup> were recovered  
259 after chromatography (Supplementary Fig. 13a), suggesting that complexes with ferrous Fe  
260 and Mn were more stable than other metal/peptide conglomerates. Interestingly, no signal  
261 could be detected when peptides were saturated with metal ions and a precipitate formed  
262 quickly upon addition of the metal solution (Supplementary Fig. 13b). Together the data  
263 suggest that IMA peptides can bind various metal ions with a moderate specificity for Fe<sup>2+</sup>,  
264 and saturation of the binding sites destabilizes the protein in aqueous solution.

265 To investigate if IMA function is conserved across species, we produced transgenic  
266 tomato plants expressing *AtIMA1* driven by the CaMV 35S promoter. Fruits of two  
267 independent transgenic tomato lines overexpressing *AtIMA1* cDNA were found to contain  
268 significantly more Fe, Mn and Zn than control plants (Fig. 8a). Perls'-DAB staining revealed  
269 pronounced Fe accumulation in the transgenic plants that was confined to the vasculature  
270 (Fig. 8b). To prove whether heterologous expression of an *IMA* ortholog from the Strategy II



271 plant rice produces the same phenotype than *AtIMAs*, we expressed *OsIMA1* cDNA in  
272 *Arabidopsis*. In rosettes of OsIMA1c Ox 12-2 and OsIMA1c Ox 7-1, the Fe concentration  
273 was increased by 1.5 to 2-fold, respectively, when compared to wild-type plants (Fig. 8c).  
274 Increased Fe levels in rosettes of the transgenic plants were confirmed by Perls' staining and  
275 were absent in control plants (Fig. 8d). Under Fe-sufficient conditions, roots of OsIMA1 Ox  
276 lines showed a slight but significant elevation in FCR activity relative to wild-type plants,  
277 indicating that the accumulation of Fe was associated with an induced Fe deficiency response  
278 in roots (Fig. 8e).

279

## 280 **Discussion**

281 We here report on the identification of a novel family of highly Fe-responsive peptides that  
282 share a short bipartite C-terminal sequence motif which is critical for Fe uptake. A database  
283 search revealed that genes encoding IMA peptides are present in all angiosperms for which  
284 data are available, indicating conservation of the motif among flowering plants. Despite their  
285 high expression levels under Fe-deficient conditions, IMA peptides have not been recognized  
286 as a family due to several constraints that render the identification of a shared consensus  
287 sequence difficult. BLAST searches for IMA peptides are hampered by their highly variable  
288 N-termini, the presence of an Asp stretch of low complexity which masks the motif for  
289 search algorithms, a gap with variable amino acids in the middle of the motif, and the high  
290 variability of the ORF size, ranging from 23 to 86 amino acids. Interestingly, partial IMA  
291 motifs were also found at the C-terminus of *rirA*, the main regulator of Fe uptake of plant-  
292 interacting alphaproteobacteria such as *Agrobacterium tumefaciens*<sup>47</sup>, as well as in the TonB  
293 Fe-siderophore receptor of *Streptomyces* bacteria.

294 The *Arabidopsis* genome contains eight *IMA* genes, six of which were suggested to  
295 produce non-coding RNAs (*IMA3-8*)<sup>48,49</sup>, a prediction based on the small size of the ORF and  
296 the absence of orthologs using BLAST. The high conservation of the IMA consensus amino  
297 acid motif and the functionality of the IMA motif when expressed without the non-conserved  
298 N-terminal part of the peptide strongly support a function of IMAs at the peptide level. This  
299 assumption is corroborated by the observed translation of *IMA1* and *IMA3* mRNA in  
300 genome-wide ribosome profiling surveys<sup>46,50</sup> (Supplementary Fig. 14). Endogenous IMAs  
301 have, however, neither been detected through antibodies nor by mass spectrometry. This  
302 could be explained by an inherent instability of the peptides and/or low translation of the  
303 transcript; stretches of aspartic acid residues were shown to negatively impact translation<sup>51</sup>.

304 Direct evidence for a function of IMAs as peptides derives from the observed increase in  
305 FCR activity in plants expressing an IMA1:EYFP fusion protein.

306 Although the exact molecular mechanism by which IMAs regulate Fe uptake genes  
307 remain to be elucidated, binding to Fe<sup>2+</sup> may control the stability of IMA peptides and  
308 thereby regulate Fe uptake. Negatively charged residues such as aspartate participate in the  
309 Fe coordination in numerous proteins<sup>52,53,54</sup>. Consistent with the putative metal-binding  
310 properties of the Asp stretch in the IMA motif, we showed that IMA peptides can bind Fe<sup>2+</sup>  
311 and other metals. Saturation of the binding sites triggered precipitation of the peptide.  
312 Because IMAs are predominantly expressed under low Fe availability, we hypothesized that  
313 the instability of IMAs constitute a negative feedback on the Fe uptake machinery which is  
314 triggered by phloem Fe under Fe-replete conditions. This would explain the very low  
315 accumulation of EYFP:IMA1 protein in the overexpressor, the difficulty to detect  
316 endogenous IMA peptides, as well as the relative moderate effect of IMAs from wild-types  
317 scions on *ima8x* rootstocks FCR.

318 The massive induction of IMA-encoding genes in response to Fe deficiency observed  
319 in several angiosperms suggests that the function of peptides of the IMA family in Fe  
320 homeostasis is conserved across species. The expression of *IMAs* is not regulated by Cu<sup>55</sup> or  
321 Zn deficiency<sup>56</sup> and is highly correlated with several well-established Fe-specific regulatory  
322 genes<sup>17</sup>. Overexpression of the IMA motif overrides the repression of Fe uptake exerted by an  
323 adequate Fe status of the plant and triggers an Fe deficiency response in root cells, leading to  
324 an increase in the concentration of primary and secondary substrates of the high affinity Fe  
325 transporter IRT1 (*i.e.* Fe<sup>2+</sup>, Mn<sup>2+</sup> and Zn<sup>2+</sup>) in roots and aerial plant parts. On the other hand,  
326 silencing of all the *IMA* genes in the *ima8x* mutant leads to lethality in absence of a drastic Fe  
327 supplementation and impairs the response to Fe deficiency. It thus appears that IMAs  
328 represent an integral component of cellular Fe homeostasis, which is not confined to taxa that  
329 have adopted a reduction-based (*i.e.* Strategy I type) Fe acquisition system such as  
330 *Arabidopsis*. Our data further show that the level of IMA peptides dictates the uptake of Fe  
331 by acting upstream of the species-specific Fe acquisition machinery. The strong phenotype of  
332 *ima8x* mutants show that functional IMAs are crucial for cellular Fe homeostasis under both  
333 Fe-replete and Fe-deficient conditions. The excess Fe phenotype of IMA Ox lines is  
334 reminiscent of Fe over-accumulating mutants defective in shoot-to-root signaling such as  
335 *opt3*<sup>30-31</sup> and the pea mutant *dgl*<sup>28</sup>, supporting a putative role for IMAs as a promotive signal  
336 in the inter-organ regulation of Fe uptake. IMA functionally resembles the role of

337 CEPD1/CEPD2 in systemic nitrogen signaling<sup>33</sup>, suggesting that peptides may be critical in  
338 orchestrating the demand of the plant to tune the uptake of mineral nutrients from the soil.

339

## 340 **Material and methods**

### 341 **Plant growth conditions**

342 Seeds of *Arabidopsis thaliana* (L.) Heynh, ecotype Columbia (Col-0), were surface sterilized  
343 and germinated on media containing KNO<sub>3</sub> (5 mM), MgSO<sub>4</sub> (2 mM), Ca(NO<sub>3</sub>)<sub>2</sub> (2 mM),  
344 KH<sub>2</sub>PO<sub>4</sub> (2.5 mM), H<sub>3</sub>BO<sub>3</sub> (70 μM), MnCl<sub>2</sub> (14 μM), ZnSO<sub>4</sub> (1 μM), CuSO<sub>4</sub> (0.5 μM),  
345 CoCl<sub>2</sub> (0.01 μM), Na<sub>2</sub>MoO<sub>4</sub> (0.2 μM), and FeEDTA (40 μM), solidified with 0.4% Gelrite  
346 pure (Kelco), 1.5% sucrose and 1 g/L MES (ES media<sup>57</sup>). The pH was adjusted to 5.5 with  
347 KOH. Seeds were sown on Petri plates and stratified for 2 days in 4 °C in the dark before  
348 being transferred to a growth chamber and grown at 21 °C under continuous illumination (50  
349 μmol m<sup>-2</sup> s<sup>-1</sup>). Standard ES media was supplemented with either 40 μM FeEDTA (+Fe  
350 plants), 400 μM FeEDTA (400 Fe plants), or without Fe and 100 μM 3-(2-pyridyl)-5,6-  
351 diphenyl-1,2,4-triazine sulfonate (-Fe plants). Non-available Fe (navFe) plants were grown  
352 on ES media at pH 7 buffered with 1 g/L MOPS and with 10 μM FeCl<sub>3</sub>. Seeds were  
353 germinated and grown for 13 days on the respective media.

354 Grafting of 5 days-old seedlings was performed using a collar- and hormone-free  
355 method described in<sup>58</sup>. For *ima8x* mutants, plants were grown on ES media containing 200  
356 μM Fe-EDTA prior to grafting.

357 For elemental analysis of seeds and leaves, plants were grown on media for 13 days  
358 as mentioned above, transferred to soil containing peat moss (Jiffy), perlite (Rover Green  
359 Agriculture Co. Ltd.), and King Root Plant Medium #3 (Rover Green Agriculture Co. Ltd.) at  
360 a 10:1:1 ratio, and placed in chambers at 22°C with a photoperiod of 16 hours light and 8  
361 hours darkness at a light intensity of 100 μmol.m<sup>-2</sup>.s<sup>-1</sup>. For seed harvest, Aracons  
362 (BETATECH bvba, Ghent, Belgium) were placed over plants a week after bolting. Pots were  
363 individually watered twice a week with 50 to 100 mL of tap water and fertilized with ES  
364 nutrient solution at the 4 to 6 leaf stage and during bolting.

365

### 366 **Generation of transgenic lines**

367 Full-length *AtIMA1* cDNA was amplified with engineered BamHI sites and cloned into  
368 BamHI digested and de-phosphorylated pBIN-pROK2 (Arabidopsis Biological Resource  
369 Center) to generate the pROKIMA1 binary vector, which was used for *Arabidopsis* (lines  
370 IMA1c Ox 0-8, 1-4, 2-1 and 3-4) and tomato transformation (lines AtIMA1c Ox 1 and 3). For

371 constructs used for the overexpression of *AtIMA1* (lines IMA1o Ox 7-4 and 8-5), *IMA1oΔ1*,  
372 *IMA1oΔ2*, *IMA1oΔ3* and *IMA3*, the ORFs were cloned into PCR8/GW/TOPO (ThermoFisher  
373 Scientific). ORFs were subsequently transferred into the pH2GW7 vector<sup>59</sup> (obtained from  
374 the Vlams Instituut voor Biologie) by Gateway<sup>TM</sup> LR recombination, yielding the pHIMA1  
375 and pHIMA3 vectors. *IMA1* deletions were generated by PCR using pIMA1TOPO as a  
376 template and recombined with pH2GW7 to produce the binary pHIMA1Δ1, pHIMA1Δ2 and  
377 pHIMA1Δ3 vectors. For OsIMA1 Ox, EYFP Ox, and IMA1pep lines, the full-length cDNA  
378 of gene *LOC\_Os01g45914*, the EYFP ORF, and the partial IMA1 ORF encoding the last 17  
379 amino acids with an engineered upstream ATG codon, respectively, were subcloned into the  
380 pENTR<sup>TM</sup>/D/TOPO vector and recombined with pH2GW7 by Gateway<sup>TM</sup> LR recombination  
381 to obtain the pHOsIMA1, pHEYFP, and pHIMA1pep vectors. The 35Spro::EYFP:IMA1  
382 construct was obtained by cloning *IMA1* ORF into the PCR8/GW/TOPO vector and  
383 subsequent Gateway<sup>TM</sup> LR recombination with the pGWB542 vector<sup>60</sup>. *Agrobacterium*  
384 *tumefaciens* strain GV3101 (pMP90) was used to transform *Arabidopsis* Col-0 plants via the  
385 floral dip method<sup>61</sup>; strain LBA4404 was used to transform the tomato cultivar MicroTom as  
386 previously described<sup>62</sup>. All transgenic plants were generated by the Transgenic Plant Core  
387 Facility of Academia Sinica. Primers used for cloning are listed in Supplementary Table 4.

388

### 389 **Multiplex genome editing**

390 Target sequences were selected within coding sequences of all eight *IMAs* as close as  
391 possible to the ATG. The specificity of the sequences was assessed using the Cas-OFFinder  
392 tool (<http://www.rgenome.net/cas-offinder/>)<sup>63</sup>. Sequences and their target cutting sites are  
393 given in Supplementary Table 5. The two cassettes for expression of the multiple gRNA  
394 scaffolds were used as described in<sup>64</sup> with either flanking attL4 and attR1, or attR2 and attL3  
395 recombination sequences, respectively, for the first cassette targeting *IMA1*, 2, 3 and 7, and  
396 the second cassette targeting *IMA4*, 5, 6 and 8. Each cassette was synthesized with its  
397 flanking gateway sequences and cloned into a pUC57 vector harboring a kanamycin  
398 resistance gene by the Genewiz company (South Plainfield, NJ, USA). The  
399 *AtUBQ1pro::SpCas9::tAtUBQ1* cassette from the psgR-Cas9 vector described in<sup>65</sup> was  
400 amplified by PCR using the Phusion II HF DNA polymerase and primers harboring attB1 and  
401 attB2 flanking sequences, and cloned into pDONR221 (ThermoFisher Scientific) by BP  
402 recombination. The two multiple gRNAs and the Cas9 cassettes were cloned into the  
403 pH7m34GW vector<sup>59</sup> (obtained from the Vlams Instituut voor Biologie) through a LR  
404 reaction resulting in the pHCas9IMA8x plasmid. The pHCas9IMA8x vector was

405 subsequently transformed into *A. tumefaciens* GV3101, which was used for *Arabidopsis* Col-  
406 0 plants transformation using the floral dip method as described above. In total, 190  
407 transformed plants were selected on media containing hygromycin, and fragments of 1 to 1.5  
408 kb surrounding each *IMA* gene were sequenced. Several plants exhibited mild to severe  
409 chlorosis. The most severely affected plants harbored either deletions, frameshifts, or  
410 sequence modifications, leading to complete disruption of all eight *IMA* genes. Deletions and  
411 mutations in the *ima8x* mutant were identified by PCR and confirmed by sequencing. The  
412 35Spro::IMA1<sub>ORF</sub> and 35Spro::EYFP:IMA1 constructs described previously were  
413 transformed into the *ima8x* mutant background.

414

#### 415 **Ferric chelate reductase activity**

416 Ferric chelate reductase activity was measured as described in<sup>66</sup> using roots from 5 to 10  
417 seedlings (10-25 mg fresh weight) at the 4 to 6 leaf stage. Plants were incubated for 1 h in the  
418 dark with mild shaking in 2 mL assay solution consisting of 100  $\mu$ M Fe<sup>3+</sup>-EDTA, 300  $\mu$ M  
419 bathophenanthroline disulfonate (BPDS) in 10 mM MES at pH 5.5. Fe<sup>2+</sup>-BPDS<sub>3</sub>  
420 concentration was determined by reading the absorbance at 535 nm on a PowerWave XS2  
421 plate reader (BioTek Instruments, USA). Experiments were conducted at least three times  
422 independently.

423

#### 424 **Determination of mineral concentrations**

425 Roots and shoots from 3-week-old wild-type and AtIMA1c Ox plants grown under control  
426 conditions were harvested separately. Mineral nutrient analysis was determined by  
427 inductively coupled plasma mass spectrometry (ICP-MS). Five plants were harvested per  
428 treatment and genotype, dried in a conventional oven at 60 °C, and ground in a stainless-steel  
429 mill. Aliquots (~0.1 g dry weight) were digested in 65% HNO<sub>3</sub> and diluted to 14 mL final  
430 volume in MilliQ water prior to analysis with a 7700x ICP-MS (Agilent). For analysis of Fe  
431 only, plants were dried in an oven at 60 °C, mineralized with 225  $\mu$ L 65% HNO<sub>3</sub> at 96 °C for  
432 6 h, and oxidized with 150  $\mu$ L 30% H<sub>2</sub>O<sub>2</sub> at 56 °C for 2 h. Fe concentrations were calculated  
433 from A<sub>535nm</sub> of an assay solution that contained 1 mM BPDS, 0.6 M sodium acetate and 0.48  
434 M hydroxylamine hydrochloride against a standard curve made with FeCl<sub>3</sub>.

435

#### 436 **Biomass and chlorophyll measurement**

437 For biomass determination, rosettes of about twenty 13-day-old seedlings were weighted  
438 immediately after harvest. Subsequently, seedlings were ground with a TissueLyzer bead mill

439 and chlorophyll was extracted in 80% acetone. Total chlorophyll was calculated from  
440 absorbance measured at 645, 662, and 750 nm with a PowerWave XS2 plate reader (BioTek  
441 Instruments, USA).

442

#### 443 **Perls' staining for Fe(III)**

444 *Arabidopsis* seedlings were vacuum infiltrated with Perls' solution (2% HCl and 2%  
445 potassium ferrocyanide) for 15 minutes and incubated for another 30 minutes. Samples were  
446 then rinsed three times with distilled water. For staining embryos and histological sections,  
447 Perls' staining was intensified with diaminobenzidine (DAB) as described in Roschztardt et  
448 al<sup>67</sup>. Subsequently to the staining with Perls' solution, embryos or slides were incubated for 1  
449 h in a methanol solution containing 0.01 M sodium azide and 0.3% H<sub>2</sub>O<sub>2</sub>, and washed with  
450 100 mM sodium phosphate buffer pH 7.4. Staining was then intensified by 10 min incubation  
451 in a solution containing 0.025% DAB, 0.005% H<sub>2</sub>O<sub>2</sub> and 0.005% CoCl<sub>2</sub>. sections were cut at  
452 5 μm thickness using a RM2255 Leica microtome (Leica, Nussloch, Germany) from rosette  
453 leaves of 13-days-old plants embedded in Technovit 7100 resin (Heraeus Kulzer, Wehrheim),  
454 and imaged using a Zeiss LSM880 confocal microscope.

455

#### 456 **Motif discovery**

457 Sequences of peptides encoded by highly Fe-regulated genes that contain consensus sequence  
458 motifs were identified in transcriptomes of Fe-deficient *Arabidopsis*<sup>35</sup>, tomato<sup>38</sup>, rice<sup>34</sup>, and  
459 soybean<sup>39</sup> plants. These sequences were used as an input for the MEME suite 4.9.1 online  
460 tool<sup>68</sup>. Motif discovery was performed with the Multiple Em for Motif Elicitation tool, and  
461 the discovered motifs were then aligned with the input sequences using the Motif Alignment  
462 and Search Tool (MAST). The motif was subsequently used for a BLAST® search in the  
463 Uniprot database and thorough searches in individual genome databases.

464

#### 465 **Gene expression analysis**

466 Total RNA was extracted using the Qiagen RNeasy Plant Mini Kit according to the  
467 manufacturer's instructions. For individual genes, cDNAs were synthesized using the  
468 SuperScript III reverse transcriptase (Life Technologies) and real-time qRT-PCR was carried  
469 out in an ABI Prism 7500 Sequence Detection System (Applied Biosystems). All qRT-PCR  
470 runs were performed as described previously<sup>9</sup>. Primers used for qRT-PCR are listed in  
471 Supplementary Table 4. Paired-end stranded RNA sequencing transcriptome analysis of  
472 IMA1o Ox 7-4 and 35Spro::EYFP plants was performed as followed. Total RNA of roots and

473 shoots of Fe-sufficient and Fe-deficient 13-day-old plants was extracted with the Qiagen  
474 RNeasy Plant Mini Kit. RNA quality was verified using a Bioanalyzer 2100. RIN scores  
475 were between 9.8-10 for root and 8.3-8.7 for shoot samples. Libraries were prepared with the  
476 TruSeq stranded mRNA LT Sample Prep Kit following the manufacturer's instructions, and  
477 sequenced with HiSeq v4 HT reagents on an Illumina HiSeq-2500 sequencer. Adapter  
478 sequences were removed from raw reads using Trimmomatic in keep-two-reads mode before  
479 aligning to the *Arabidopsis* TAIR10 genome sequence. For each sample, more than 30  
480 million reads were aligned to TAIR10 gene models with at least 95% identity without indels.  
481 Sequences of T-DNAs and non-annotated IMA genes were added to the gene model  
482 database. Differential expression analysis was performed with the edge R Bioconductor  
483 package using Trimmed Mean of M values (TMM) normalization. For wild-type data, raw  
484 data from root<sup>11</sup> and shoot<sup>35</sup> were re-analyzed according to the above-mentioned method.  
485 Expression levels of genes that were differentially expressed between Fe-deficient and Fe-  
486 sufficient wild-type plants were compared to those of IMA1o Ox 7-4 plants grown under  
487 similar conditions. RNAseq data of IMA1 Ox and Fe-deficient wild-type Col-0  
488 transcriptomes have been deposited to the Gene Expression Omnibus database and are  
489 available under the accession numbers GSE87745 and GSE87760, respectively.

490

#### 491 **Synthetic peptide analysis**

492 The IMA1 peptide (ENGGDDDDSGYDYAPAA) was synthesized and HPLC-purified to  
493 98% purity by KareBay<sup>TM</sup> Biochem Inc. (NJ, U.S.A.). For metal binding assays, peptide  
494 solutions were mixed with various metal solutions containing 100  $\mu$ M Fe, 100  $\mu$ M ZnSO<sub>4</sub>,  
495 100  $\mu$ M CuSO<sub>4</sub>, and/or 100  $\mu$ M MnCl<sub>2</sub> in 10 mM ammonium acetate buffer at pH 5. Fe was  
496 provided either as FeSO<sub>4</sub> with 500  $\mu$ M ascorbic acid or as FeCl<sub>3</sub> without reductant. Complex  
497 formation was analyzed for each individual metal and a mix of the four metals using the same  
498 method. Peptide binding sites were saturated by addition of 500  $\mu$ M of each metal to 100  $\mu$ M  
499 of peptide. The mix was immediately injected into a LTQ Orbitrap Elite Hybrid Ion Trap-  
500 Orbitrap mass spectrometer (ThermoFisher Scientific) or passed through a TSK Gel amide 80  
501 column.

502

#### 503 **Immunodetection and fluorescence imaging**

504 Fluorescence was observed with a confocal Laser Scanning Microscope (Zeiss LSM 510  
505 Meta). Excitation/detection parameters were 514/535-590 nm. Root tissues were ground in  
506 liquid nitrogen and proteins were extracted in 2% SDS, 10% glycerol, 60 mM Tris-HCl pH

507 6.8. Proteins (50 µg) were loaded on a Bis-Tris 4-12% gradient gel (NuPAGE, ThermoFisher  
508 Scientific), and blotted onto a PVDF membrane according to manufacturer's instructions.  
509 Immunoblots were performed using a commercial anti-GFP primary polyclonal antibody  
510 raised in rabbit (Abcam, ab290) and a secondary anti-rabbit IgG raised in donkey and  
511 conjugated to a horseradish peroxidase (GE Healthcare, NA934V).

512

## 513 **References**

- 514 1. B. de Benoist, *et al.*, *WHO Global Database on Anaemia* (2008).  
515 2. V. Römheld, H. Marschner, *Plant Physiol.* **80**, 175-180 (1986).  
516 3. T. Kobayashi, N. K. Nishizawa, *Annu. Rev. Plant Biol.* **63**, 131-152 (2012).  
517 4. C. Curie, *et al.*, *Nature* **409**, 346-349.  
518 5. R. J. DiDonato, *et al.*, *Plant J.* **39**, 403-414 (2004).  
519 6. N. J. Robinson, *et al.*, *Nature* **397**, 694-697 (1999).  
520 7. D. Eide, *et al.*, *Proc. Natl. Acad. Sci. USA* **93**, 5624-5628 (1996).  
521 8. Vert, *et al.*, *Plant Cell* **14**, 1223-1233 (2002).  
522 9. S. Santi, W. Schmidt, *New Phytol.* **183**, 1072-1084 (2009).  
523 10. Y. Ishimaru, *et al.*, *Plant J.* **45**, 335-346 (2006).  
524 11. J. Rodríguez-Celma, *et al.*, *Plant Physiol.* **162**, 1473-1485 (2013).  
525 12. P. Fourcroy, *et al.*, *New Phytol.* **201**, 155-167 (2014).  
526 13. N. B. Schmid, *et al.*, *Plant Physiol.* **164**, 160-172 (2014).  
527 14. H. H. Tsai, W. Schmidt, *Trends Plant Sci.* **22**, 538-548 (2017).  
528 15. J. Rajniak, *et al.*, *Nat. Chem. Biol.* **14**, 442-450 (2018).  
529 16. E. P. Colangelo, M. L. Guerinot, *Plant Cell* **16**, 3400-3412 (2004).  
530 17. T. A. Long, *et al.*, *Plant Cell* **22**, 2219-2236 (2010).  
531 18. Y. X. Yuan, *et al.*, *Cell Res.* **18**, 385-397 (2008).  
532 19. N. Wang, *et al.*, *Mol. Plant* **6**, 503-513 (2013).  
533 20. X. Li, *et al.*, *Plant Physiol.* **170**, 2478-2493 (2016).  
534 21. Zhang, *et al.*, *Plant Cell* **27**, 787-805 (2015).  
535 22. D. Selote, *et al.*, *Plant Physiol.* **167**, 273-286 (2015).  
536 23. H. Inoue, *et al.*, *J. Biol. Chem.* **284**, 3470-3479 (2009).  
537 24. Y. Ogo, *et al.*, *Plant J.* **51**, 366-377 (2007).  
538 25. L. Zheng, *et al.*, *BMC Plant Biol.* **10**, 166 (2010).  
539 26. T. Kobayashi, *et al.*, *S. Nat. Commun.* **4**, 2792 (2013).  
540 27. H Zhang, *et al.*, *Plant Physiol.* **175**, 543-554 (2017).



- 541 28. M.A. Grusak, S. Pezeshgi, *Plant Physiol.* **110**, 329-334 (1996).
- 542 29. E. E. Rogers, M. L. Guerinot, *Plant Cell* **14**, 1787-1799 (2002).
- 543 30. M. G. Stacey, *et al.*, *Plant Physiol.* **146**, 589-601 (2008).
- 544 31. Z. Zhai, *et al.*, *Plant Cell* **26**, 2249-2264 (2014).
- 545 32. R. Tabata *et al.*, *Science* **346**, 343-346 (2014).
- 546 33. Y. Okhubo, *et al.*, *Nat. Plants* **3**, 17029 (2017).
- 547 34. L. Zheng, *et al.* *Plant Physiol.* **151**, 262-274 (2009).
- 548 35. J. Rodríguez-Celma, *et al.*, *Front. Plant Sci.* **4**, 276 (2013).
- 549 36. H. Roschzttardtz, *et al.*, *Front. Plant Sci.* **4**, 350 (2013).
- 550 37. T. J. Buckhout, T. J. Yang, W. Schmidt, *BMC Genomics* **10**, 147 (2009).
- 551 38. A. Zamboni, *et al.*, *BMC Genomics* **13**, 101 (2012).
- 552 39. A. N. Moran Lauter, *et al.*, *BMC Genomics* **15**, 702 (2014).
- 553 40. M. Klatte, *et al.*, *Plant Phys.* **150**, 257-271 (2009).
- 554 41. T. P. Durrett, *et al.*, *Plant Phys.* **144**, 197-205 (2007).
- 555 42. K. Ravet, *et al.*, *Plant Journal* **57**, 400-412 (2009).
- 556 43. J. Gollhofer, *et al.*, *Plos One* **9**, 10 (2014).
- 557 44. M. Le Jean, *et al.*, *Plant Journal* **44**, 769-782 (2005).
- 558 45. M. A. Khan, *et al.*, *Plant Cell Environ.* doi :10.1111/pce.13192 (2018).
- 559 46. A. Mustroph, *et al.*, *Proc. Natl. Acad. Sci. USA* **106** :18843-18848 (2009).
- 560 47. P. Ngok-Ngam, *et al.*, *J. Bacteriol.* **191**, 2083-2090 (2009).
- 561 48. J. Liu, *et al.*, *Plant Cell* **24**, 4333-4345 (2012).
- 562 49. Q. H. Zhu, *et al.*, *New Phytol.* **201**, 574-584 (2014).
- 563 50. P. Juntawong, *et al.*, *Proc. Natl. Acad. Sci. USA* **111**, 203-212 (2013).
- 564 51. Y. Chadani, *et al.*, *Mol. Cell* **68**, 528-539 (2017).
- 565 52. P. F. Lindley, *et al.*, *J. Biol. Inorg. Chem.* **2**, 454-463 (1997).
- 566 53. F. Bou-Abdallah, *Biochim. Biophys. Acta* **1800**, 719-731 (2010).
- 567 54. M. C. Bonaccorsi di Patti, *et al.*, *Yeast* **22**, 677-687 (2005).
- 568 55. M. Bernal, *et al.*, *Plant Cell* **24**, 738-761 (2012).
- 569 56. H. Azevedo, *et al.*, *Genomics Data* **7**, 256-258 (2016)
- 570 57. M.A. Estelle, C. Somerville, *Mol. Gen. Genet.* **206**, 200-206 (1987).
- 571 58. N. Marsch-Martínez, *et al.*, *Plant Methods* **9**, 14 (2013).
- 572 59. M. Karimi, D. Inze, A. Depicker, *Trends Plant Sci.* **7**, 193-195 (2002).
- 573 60. T. Nakagawa, *et al.*, *J. Biosci. Bioeng.* **104**, 34-41 (2007).
- 574 61. S. J. Clough, A. F. Bent, *Plant J.* **16**, 735-743 (1998).

575 62. J. Van Eck, D.D. Kirk., A. M. Walmsley, *Methods Mol. Biol.* **343**, 459-473 (2006).

576 63. S. Bae, J. Park, J.-S. Kim, *Bioinformatics* **30**, 1473-1475 (2014).

577 64. H.-L. Xing, *et al.*, *BMC Plant Biol.* **14**, 327 (2014).

578 65. Y. Mao, *et al.*, *Mol. Plant* **6**, 2008-2011 (2013).

579 66. L. Grillet, *et al.*, *J. Biol. Chem.* **289**, 2515-2525 (2014).

580 67. H. Roschztardt, *et al.*, *Plant Phys.* **151**, 1329-1338 (2009).

581 68. T. L. Bailey *et al.*, *Nucleic Acids Res.* **37**, 202-208 (2009).

582

583 **Acknowledgments:** We thank Thomas J. Buckhout (Humboldt University, Germany) and  
584 Marjori Matzke (IPMB, Academia Sinica) for valuable suggestions and critical comments on  
585 the manuscript. We further thank Stéphane Mari and Cathy Curie (INRA-SUPAGRO,  
586 France) for helpful discussions. We are grateful to Julia Bailey-Serres for kindly providing  
587 ribosome profiling data of IMA genes. RNA sequencing was performed by the High  
588 Throughput Genomics Core Facility with the assistance of Mei-Yeh Lu, supported by  
589 Academia Sinica. We thank Lin-Yun Kuang and Sheng-Ming Chen from the Transgenic  
590 Plant Laboratory of IPMB for performing tomato and *Arabidopsis* transformations, Mei-Jane  
591 Fang from the IPMB Live Cell Imaging Core Laboratory for the help with confocal imaging,  
592 Wen-Dar Lin from the Bioinformatics Core Laboratory at IPMB for bioinformatics support,  
593 Yet-Ran Chen and Yu-Chen Huang from the Metabolomics Core Laboratory of the  
594 Agricultural Biotechnology Research Center for the support with the ESI-MS. Elemental  
595 analysis were conducted through the use of ICP-MS by P.L. supported by the Natural Science  
596 Foundation of China (31370280) and the Project of Priority and Key Areas, ISSCAS  
597 (ISSASIP1605). This work was supported by an Academia Sinica Investigator Award to  
598 W.S.

599

600 **Authors contributions:** W.S., L.G. and P.L. designed the research, L.G., P.L., W.L. and  
601 G.M. performed and analysed experiments, W.S. and L.G. wrote the manuscript.

602

603 **Competing Interest Statement:** The authors declare competing financial interests:  
604 provisional patent US 20150315250 A1.

605

606 Correspondence and requests for materials should be addressed to W.S. (e-mail:

607 [wosh@gate.sinica.edu.tw](mailto:wosh@gate.sinica.edu.tw)).

608

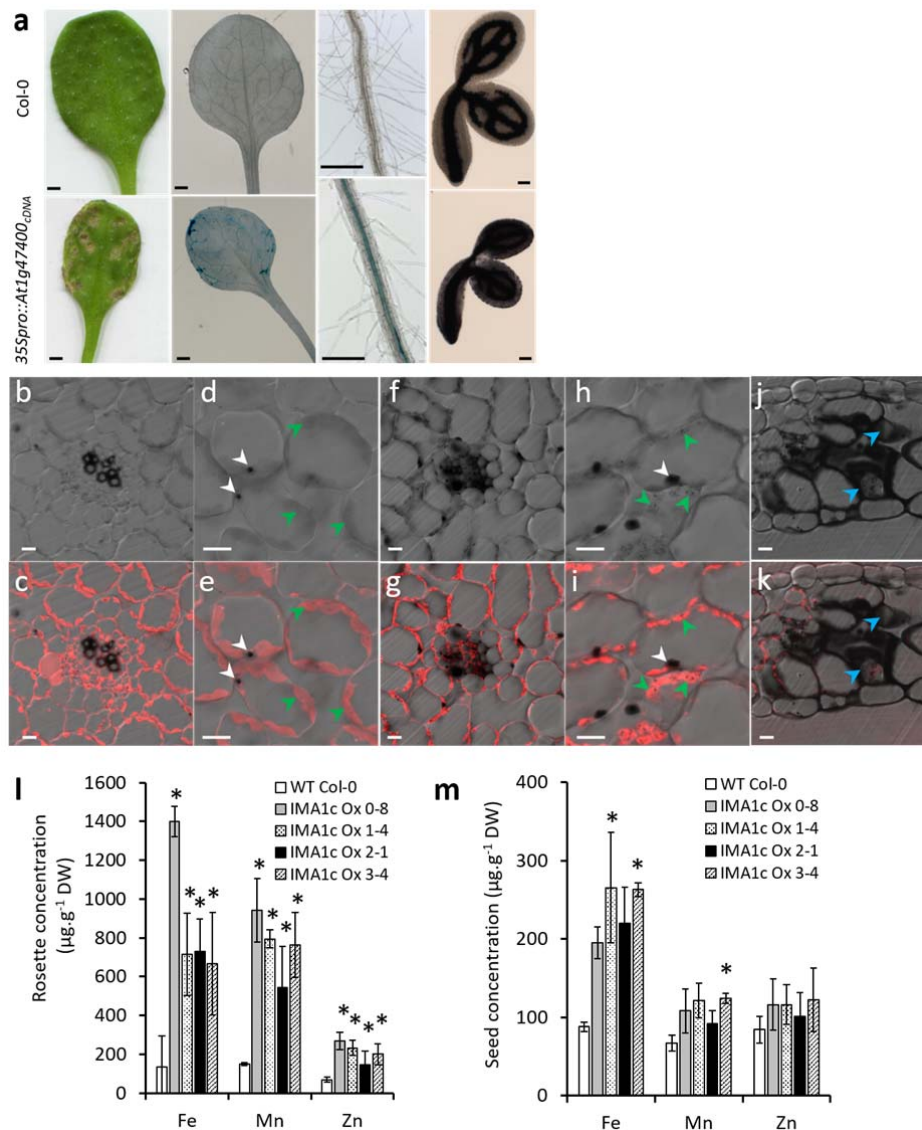

609

610 **Fig. 1.** Overexpression of *IMA1* triggers Fe, Mn and Zn accumulation in *Arabidopsis*. (a)  
611 Leaves, roots and embryos of Col-0 (upper panel) and 35Spro::*IMA1*<sub>cDNA</sub> (*IMA1c Ox*) plants  
612 (lower panel). Leaves of *IMA1 Ox* lines show necrotic spots ('bronzing') due to Fe  
613 overaccumulation. Leaves and roots were stained with Perls' reagent; embryos were stained  
614 with Perls' reagent plus DAB to reveal Fe accumulation. (b-k) Fe localization in sections of  
615 resin-embedded leaves stained with Perls'-DAB. (b-e) Leaves of wild-type plants. (f-k)  
616 Leaves of *IMA1 Ox* plants. (b-i) Fe accumulation in vascular tissues (b, c, f, g) and  
617 subcellular Fe localization in mesophyll cells (d, e, h, i). High Fe concentrations were  
618 observed in nuclei, nucleoli and plastids. (h, i) Dot-shaped structures are visible only in  
619 plastids of *IMA1 Ox* lines. (j, k) Necrotic spots in *IMA1 Ox* leaves. Upper panel, differential  
620 interference contrast (DIC) pictures; lower panel, DIC and autofluorescence overlap. White

621 arrows denote nuclei, green arrows indicate plastids, blue arrows point to shrunk necrotic  
 622 cells. (l) Quantification of Fe, Mn and Zn in seeds and (m) rosette leaves by ICP-MS. Results  
 623 are means  $\pm$  SE (n = 3 sets of 3 plants). Stars indicate significant difference to control plants  
 624 (Duncan test,  $P \leq 0.05$ ). Scale bar = 500  $\mu$ m for leaves and roots, 50  $\mu$ m for embryos, 10  $\mu$ m  
 625 for histological sections.

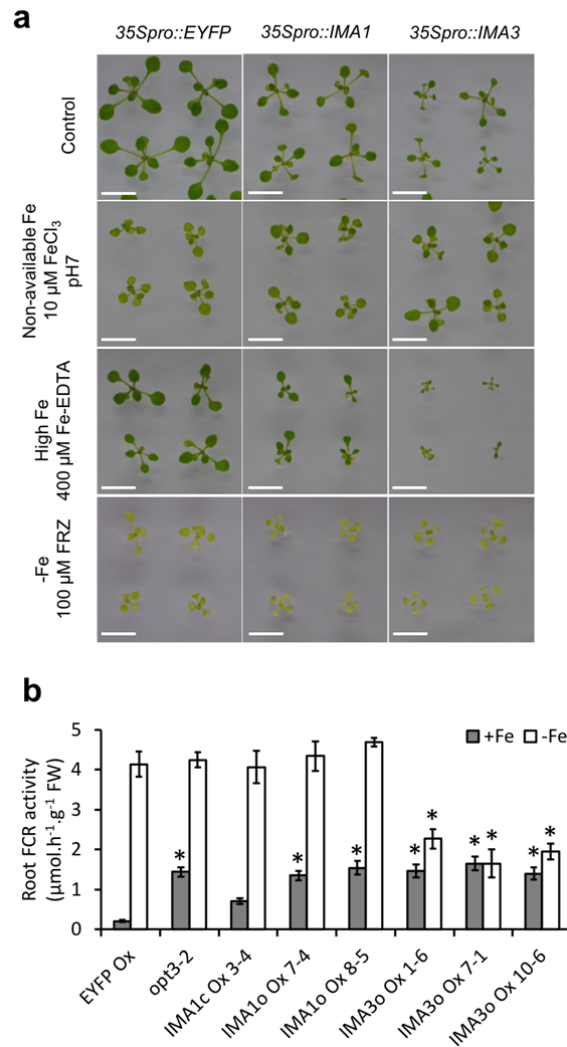

626  
 627 **Fig. 2.** Phenotypic characterization of transgenic plants with altered expression of *IMA* genes.  
 628 (a) Thirteen-day-old IMA1 Ox and IMA3 Ox plants grown under various Fe regimes. (b)  
 629 Root ferric-chelate reductase (FCR) activity of plants grown for three days on Fe-replete and  
 630 Fe-free media (n = 8 sets of 5 roots). Control, Estelle and Somerville (ES) media containing  
 631 40  $\mu$ M FeEDTA; Non-available Fe, ES media containing 10  $\mu$ M FeCl<sub>3</sub>, pH 7; -Fe, ES media  
 632 without added Fe and supplemented with 100  $\mu$ M FerroZine (FRZ); IMA1c Ox:  
 633 35Spro::AtIMA1<sub>cDNA</sub>; IMA1o Ox: 35Spro::AtIMA1<sub>ORF</sub>; IMA3o Ox: 35Spro::AtIMA3<sub>ORF</sub>.

634 Results show means  $\pm$  SE. Stars indicate significant difference to control plants grown under  
 635 the same conditions (Duncan test,  $P \leq 0.05$ ). Scale bar = 1 cm.

636

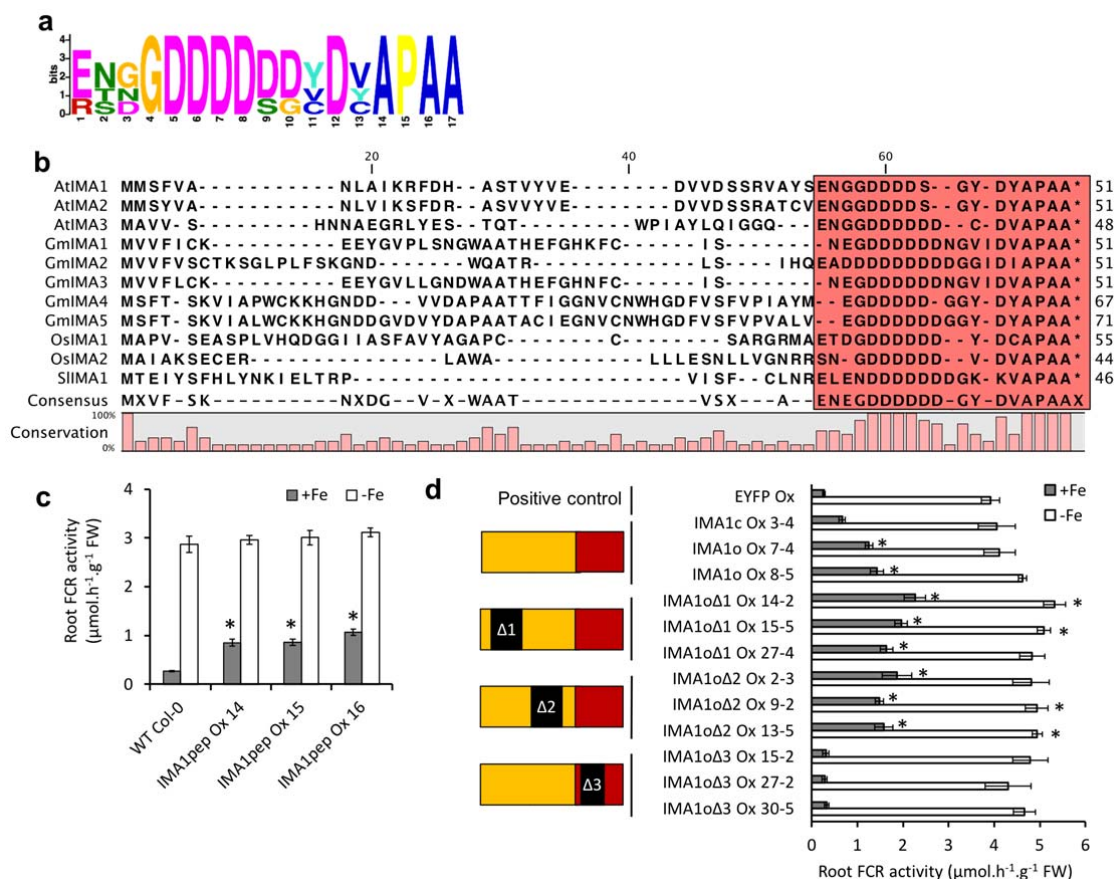

637

638 **Fig. 3.** The C-terminal amino acid consensus motif is critical for IMA1 function. (a) Logo of  
 639 the motif inferred from the sequences of 132 putative IMA peptides (Supplementary Table  
 640 S2). (b) Amino acid alignment of the putative IMAs identified in transcriptomes of  
 641 *Arabidopsis thaliana* (AtIMA), soybean (GmIMA), rice (OsIMA) and tomato (SIIMA). (c)  
 642 Root FCR activity of plants expressing a peptide corresponding to the 17 C-terminal amino  
 643 acids of AtIMA1 plus a N-terminal methionine residue (n = 5 sets of 5 roots). (d) Root FCR  
 644 activity of plants overexpressing *IMA1* and mutated versions of the ORF harboring deletions  
 645 of various parts of the protein. Results are means  $\pm$  SE (n = 6 sets of 5 roots). Stars indicate  
 646 significant difference to control plants grown under the same conditions (Duncan test,  $P \leq$   
 647 0.05). IMA1c Ox, 35Spro::AtIMA1<sub>cDNA</sub>; IMA1o Ox, 35Spro::AtIMA1<sub>ORF</sub>. IMA3o,  
 648 35Spro::AtIMA3<sub>ORF</sub>; IMA1pep Ox, 35Spro::IMA1pep.

649

650

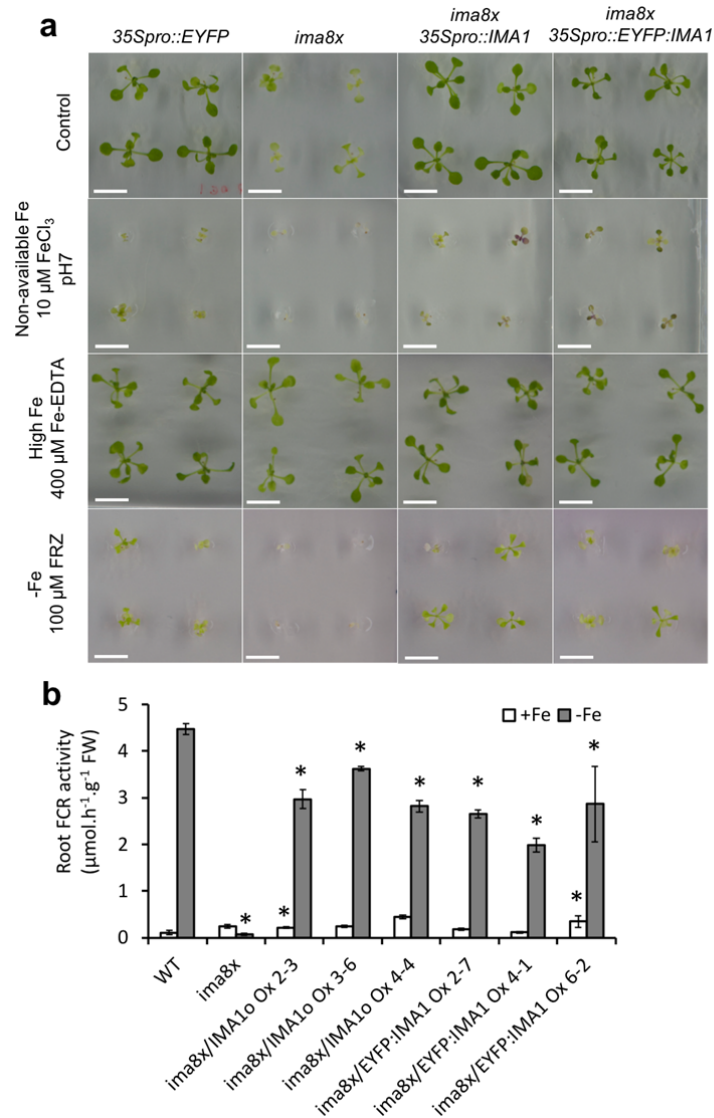

651

652 **Fig. 4.** Silencing of eight *IMA* genes by CRISPR-Cas9 gene editing and complementation  
 653 with *IMA1* and *EYFP:IMA1*. (a) Gene editing effects on octuple *ima8x* mutants grown under  
 654 various Fe regimes. Control, Estelle and Somerville (ES) media containing 40 μM FeEDTA;  
 655 Non-available Fe, ES media containing 10 μM FeCl<sub>3</sub>, pH 7; -Fe, ES media without added Fe  
 656 and supplemented with 100 μM FerroZine (FRZ). (b) Root ferric chelate reductase (FCR)  
 657 activity (n = 6 sets of 5 roots) of wild-type plants (WT) and *ima8x* mutants grown for three  
 658 days on Fe-replete and Fe-free media. Results are means ± SE. Stars indicate significant  
 659 difference to control plants grown under the same conditions (Duncan test,  $P \leq 0.05$ ). *ima8x*,  
 660 genes with silencing mutations in all eight *IMA* genes (Supplementary Fig. 7-8);  
 661 *ima8x*/IMA1o Ox, *ima8x* plants expressing a 35Spro::IMA1 construct; *ima8x*/EYFP:IMA1  
 662 Ox, *ima8x* plants expressing a 35Spro::EYFP:IMA1 construct. Scale bar = 1cm.

663

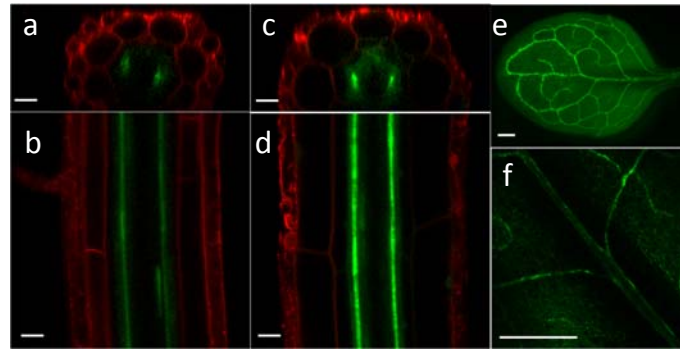

664

665 **Fig. 5.** Expression pattern of IMA1 visualized in *promIMA1::EYFP* expressing plants; (a,b)

666 Yellow fluorescence observed in roots of control and (c,d) Fe-deficient plants; (e,f)

667 Expression of IMA1 in leaves. Scale bar = 30 μm for roots, 500 μm for leaves.

668

669

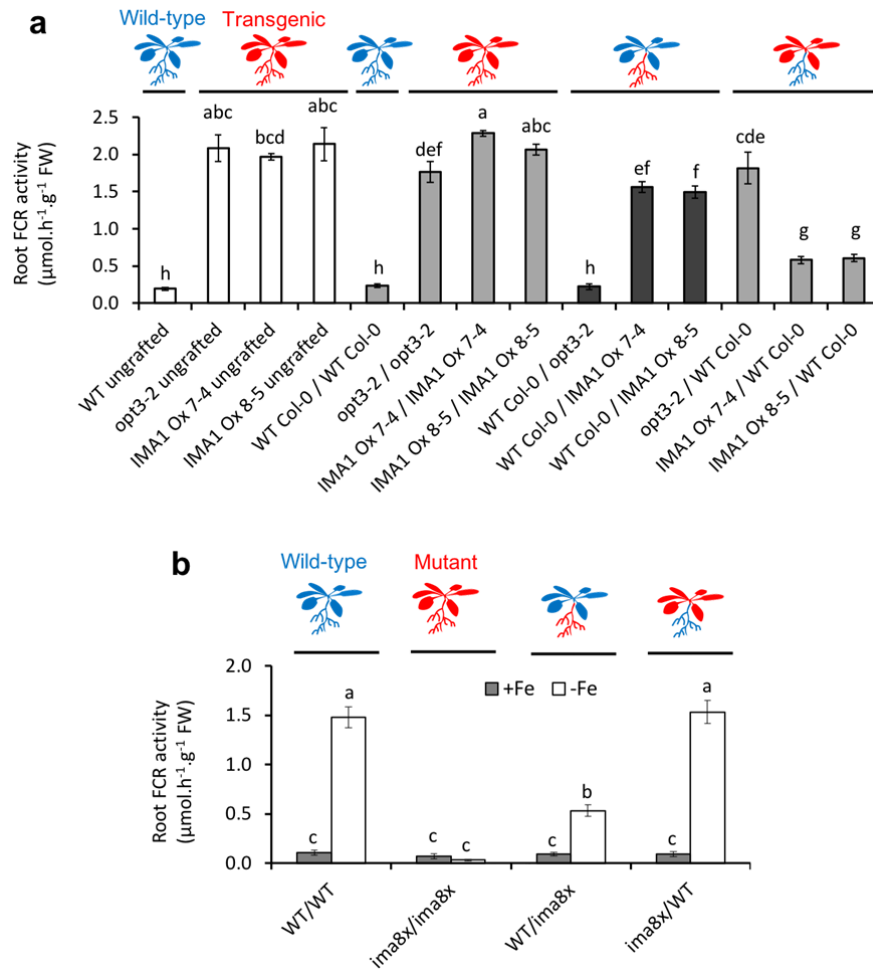

670

671 **Fig. 6.** Root FCR activity of reciprocally grafted plants. (a) Grafting of wild-type Col-0  
 672 plants, *opt3-2* mutants, and IMA1 Ox lines grown on control (ES) media; (b) Grafting of  
 673 wild-type Col-0 plants and *ima8x* mutants grown on control and Fe-deficient media. Results  
 674 are means  $\pm$  SE (n = 6 sets of 5 roots). Stars indicate significant difference to control plants  
 675 (Duncan test,  $P \leq 0.05$ ).



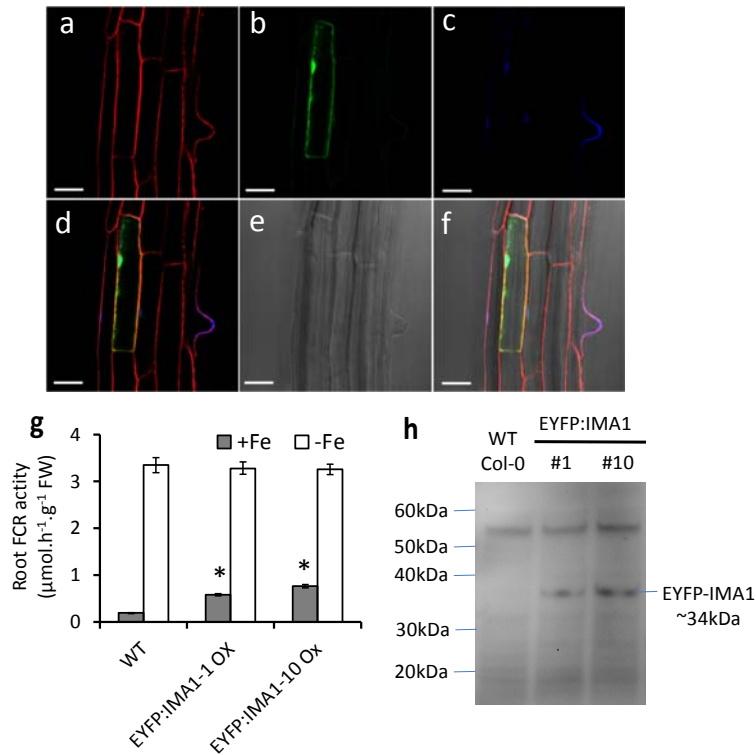

676

677 **Fig. 7.** Expression of an EYFP:IMA1 fusion protein. (a-f) Subcellular localization of  
678 EYFP:IMA1. (a) Red fluorescence channel showing FM4-64 staining. (b) Yellow  
679 fluorescence indicating EYFP localization. (c) Blue fluorescence revealing nuclei stained  
680 with DAPI. (d) Merge of the three fluorescence channels. (e) Bright field image. (f) Merge of  
681 all channels. (g) Root FCR activity of transgenic plants overexpressing EYFP:IMA1 fusion  
682 protein. (h) Western blot with anti-GFP antibodies. Results are means  $\pm$  SE (n = 6 sets of 5  
683 roots). Stars indicate significant difference to control plants (Duncan test,  $P \leq 0.05$ ). Scale bar  
684 = 30  $\mu\text{m}$ .

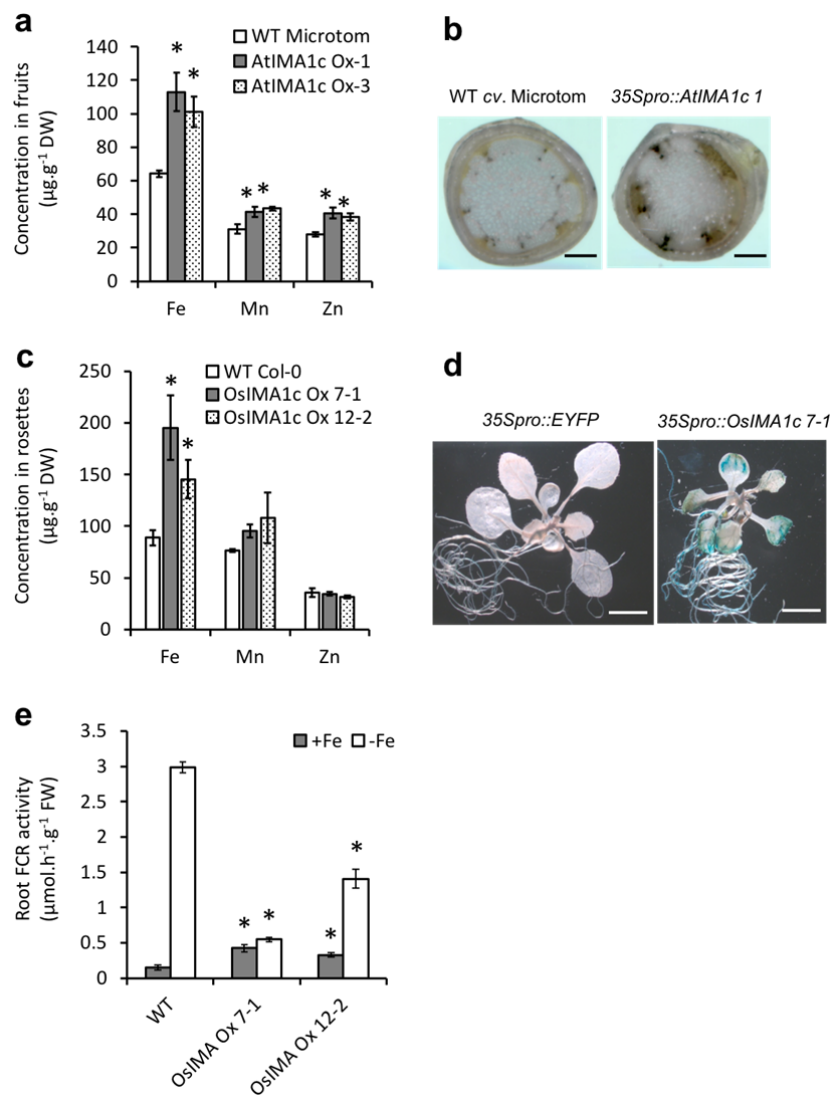

685

686 **Fig. 8.** IMA function is conserved across species. (a) Fe, Zn and Mn concentrations in fruits  
 687 of transgenic tomato plants (n = 3 sets of 3 plants) expressing 35Spro::AtIMA1<sub>cDNA</sub>  
 688 (AtIMA1c Ox). (b) Visualisation of Fe by Perls'-DAB staining in cross-sections of stems  
 689 from wild-type (cv. Microtom) and AtIMA1c Ox plants, scale bar = 100 μm. (c) Fe, Zn and  
 690 Mn concentrations in rosette leaves of *Arabidopsis* plants (n = 3 sets of 15 plants) expressing  
 691 35Spro::OsIMA1<sub>cDNA</sub> (OsIMA1 Ox). (d) Root FCR activity of OsIMA1 Ox plants. (e)  
 692 Visualisation of Fe by Perls' staining in seedlings of OsIMA1 Ox plants, scale bar = 300 μm.  
 693 Results show means ± SE. Stars indicate significant difference to the control plants grown  
 694 under the same conditions (Duncan test,  $P \leq 0.05$ ).

695
